# Supplementary material for: Cu3N and its analogs: a new class of electrodes for lithium ion batteries
Source: Royal Society of Chemistry journal article supplement (doi:10.1039/c7ta02339a), 2017-01-01
Supplement: c7ta02339a1.pdf [file c7ta02339a1.pdf]

## SUPPLEMENTARY INFORMATION

### **Cu<sub>3</sub>N and its analogs: A new class of electrodes for lithium ion batteries**

Junru Wang<sup>a</sup>, Feng Li<sup>a,b</sup>, Xiaobiao Liu<sup>a</sup>, Hongcai Zhou<sup>a</sup>, Xiaofei Shao<sup>a</sup>, Yuanyuan Qu<sup>a</sup>,  
Mingwen Zhao<sup>\*a</sup>

<sup>a</sup>School of Physics and State Key Laboratory of Crystal Materials, Shandong University, Jinan, 250100, Shandong, China.

<sup>b</sup>School of Physics and Technology, University of Jinan, Jinan, 250022, Shandong, China.

\*Email - mingwen.zhao@gmail.com

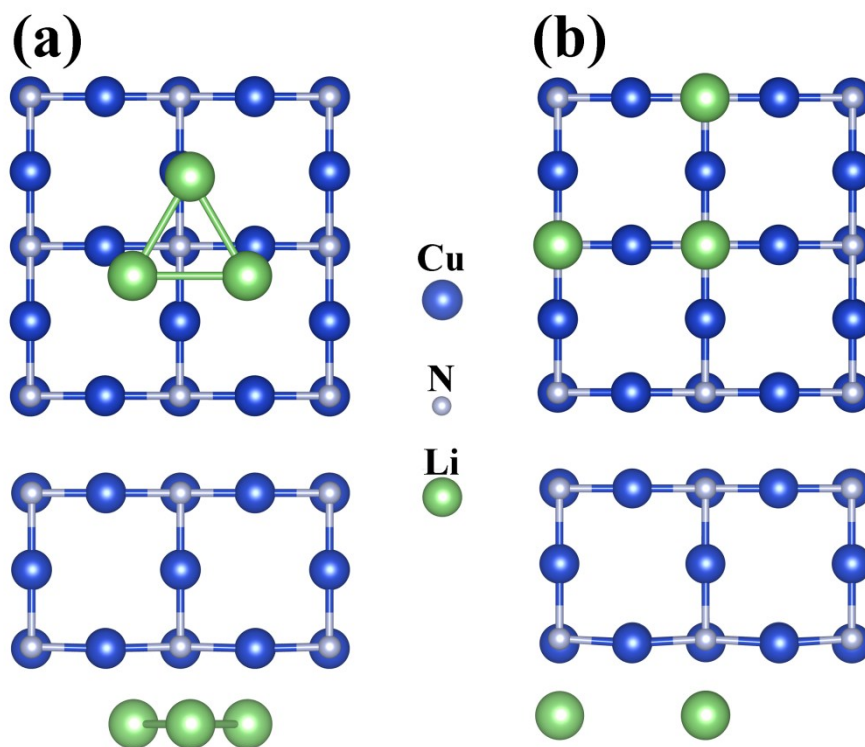

**Figure S1.** (a) Top and side views of Li trimer adsorbed on the Cu<sub>3</sub>N nanosheet before the structural optimization. (b) Top and side views of Li trimer adsorbed on the Cu<sub>3</sub>N nanosheet after the structural optimization.
